# Supplementary material
Source: PubMed Central journal article supplement (PMC2937512)
Supplement: supp_76_18_6141__1.pdf [file supp_76_18_6141__1.pdf]

***PlodAB***

.....aat [ ttctgttattgagacggctcactgaaaactacaaattggcattggagttagataaa  
tgagggttctat tttgtgaacagagattaagacgaatcaaattacgcgatctaattttagatcgcg  
aatttaacgttgggtct [ ttcagagaaacagcctcccttgtcaagagggattaactgatactgaa  
ctgatactgccgtacctgcattgctctgcttaactgaaaga**C**cattcgtataaaaaacggtttatg  
gat ] tttagttatcaacaa**aggag**taagttatg

***PppoA***

..ttctat ttcattgattgcttaattgtctcgccaaagcgcactgcactcacagcgagacactagt  
gtaatcccggtgtaattgtagactgagccgctttttgctagtcctttaga**G**taccgacactctcacia  
**aagg**actcatcaatg

***PppoB***

.....ttcaagccgcggttattcgcaggtgctctagcgttttaagagcaaagaactgtgtaa  
ataaattggctagtgaacaggaat tttctgattagacctaaaaagagggcatatggaaaacaaag  
tgtaacaagggtgtaattgaataattgaagttactcttatat tttttgttaa**G**gctagagaaccagt  
cttgtttttaattaaaaatgtcatccgaaattacaattat tttttgtttaaaaaaggtttttaact  
**tgagg**gaaaatcatg

**Fig. S1.** Comparison of promoters of different *M. mediterranea* genes encoding oxidases: *PlodAB* (this study), *PppoA* (1), *PppoB* (2). All sequences are shown up to the initial ATG codon. Putative rbs in bold. Transcriptional start site determined by 5'-RACE in bold upper case. Predicted -10 and -35 hexamers are underlined. Brackets in *PlodA* sequence indicate the two fragments cloned for generating *lacZ* fusions, *PlodAB* (252 bp) and *PlodAB* (115 bp). Double underlined italics indicate palindromic sequences of unknown function.

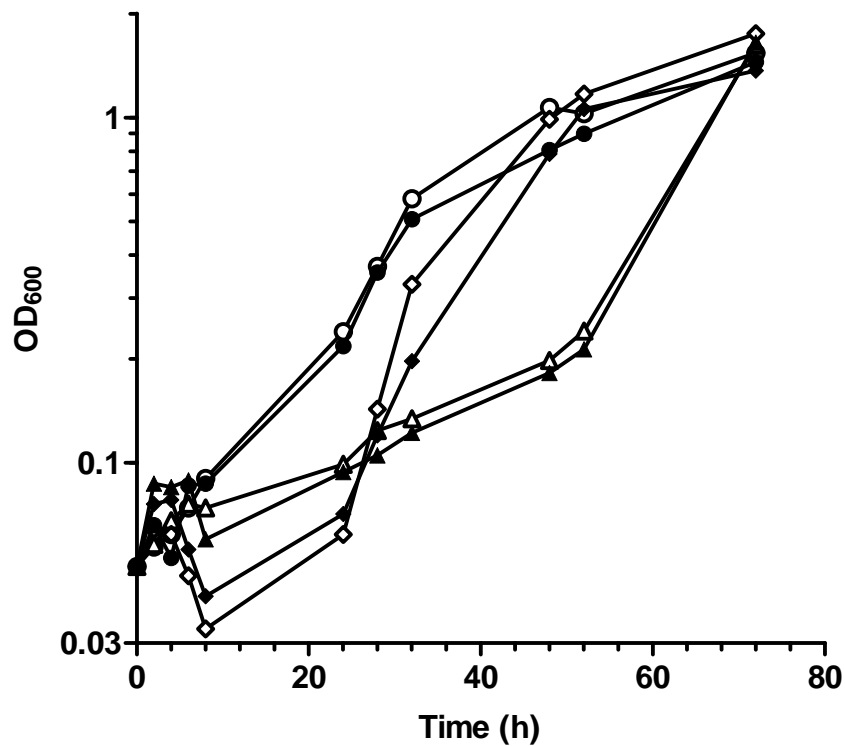

**Fig. S2.** Use of L-Lys, L-Arg and DAP by *M. mediterranea* MMB1-R (closed symbols) and LD (open symbols). Both strains were inoculated in MNL (glucose 30 mM and L-Lys 3 mM as nitrogen source) (diamonds) and media in which L-Lys is substituted by L-Arg (triangles) or DAP (circles).

## References:

- 1. Sanchez-Amat, A., P. Lucas-Elío, E. Fernández, J. C. Garcia-Borrón, and F. Solano.** 2001. Molecular cloning and functional characterization of a unique multipotent polyphenol oxidase from *Marinomonas mediterranea*. *Biochim. Biophys. Acta* **1547**:104-116.
- 2. López-Serrano, D., F. Solano, and A. Sanchez-Amat.** 2004. Identification of an operon involved in tyrosinase activity and melanin synthesis in *Marinomonas mediterranea*. *Gene* **342**:179-187.
